# Supplementary material
Source: PubMed Central journal article supplement (PMC3290668)
Supplement: supp_111.093229_93229SupTabS1V3.pdf [file supp_111.093229_93229SupTabS1V3.pdf]

Rosa et al., Supplemental Table S1. Sequences of Primers.

| Gene         | Sequence                                                                        |
|--------------|---------------------------------------------------------------------------------|
| <i>Has1</i>  | F- GGT TAC GCG TGC TCA TGG T<br>R- CCT CAT CGG CGA AGA CTT CT                   |
| <i>Has2</i>  | F-GGG AAC TCA GAC GAC GAC CTT<br>R-GAT GTA CGT GGC CGA TTT GTC                  |
| <i>Hyal1</i> | F-GGT TAC GCG TGC TCA TGG T<br>R-CCT CAT CGG CGA AGA CTT CT                     |
| <i>Hyal2</i> | F-GGG AAC TCA GAC GAC GAC CTT<br>R-GAT GTA CGT GGC CGA TTT GTC                  |
| <i>Vcan</i>  | F-CCC TTT GAG CAT AGC AGT AGT AGT CA<br>R-ATG AGT TCC ATA CCA GTA CTA GCA TCT C |
| <i>36B4*</i> | F-CAC TGG TCT AGG ACC CGA GAA G<br>R-GGT GCC TCT GGA GAT TTT CG                 |

\*Official symbol *Rplp0*.
